# Supplementary material
Source: Springer Nature journal article supplement (https://www.springermedizin.de/resource/supplementary/12885_2010_2200_MOESM8_ESM.pdf/9460746)
Supplement: MOESM8 [file 9460746]

| Number  | Sex/age | FAB subtype   | Secondary to | RUNX1 (exons 1-8)            | TET2 (exons 3-11) | ASXL1* (exon 12) | NPM1 (exon 12) | CBL (exons 8, 9) | FLT3 ITD/TKD* | JAK2 (V617F) | RAS* (exons 1, 2) | IDH1 (exon 4)    | IDH2 (exon 4)    | WT1 (exons 7, 9) | Number of altered alleles | Karyotype    |
|---------|---------|---------------|--------------|------------------------------|-------------------|------------------|----------------|------------------|---------------|--------------|-------------------|------------------|------------------|------------------|---------------------------|--------------|
| HD-0001 | M/72    | M5a           |              | no                           | p.Lys845Arg.fsX26 | no               | no             | no               | no            | no           | no                | no               | no               | no               | 1                         | trisomy 8    |
| HD-0003 | M/70    | M5a           |              | no                           | no                | no               | yes            | no               | no            | no           | no                | no               | no               | no               | 1                         | normal       |
| HD-0009 | F/68    | M5b           |              | no                           | p.Lys959GluX13    | no               | yes            | no               | no            | na           | no                | no               | no               | no               | 2                         | normal       |
| HD-0010 | M/73    | M5b           |              | no                           | no                | no               | yes            | no               | no            | no           | no                | no               | no               | no               | 1                         | normal       |
| HD-0011 | F/47    | M5b           |              | no                           | no                | no               | yes            | no               | yes           | no           | no                | no               | no               | no               | 2                         | normal       |
| HD-0012 | M/21    | M5a           |              | no                           | no                | no               | no             | no               | yes           | no           | no                | no               | no               | no               | 1                         | normal       |
| HD-0016 | M/78    | M5a           |              | no                           | p.Arg1366His      | no               | no             | no               | yes           | no           | no                | no               | no               | no               | 2                         | trisomy 8    |
| HD-0019 | M/67    | M4            |              | no                           | no                | no               | yes            | no               | no            | no           | no                | no               | no               | no               | 1                         | normal       |
| HD-0020 | M/59    | M4            |              | no                           | no                | no               | no             | p.Arg140Gln      | no            | no           | no                | no               | no               | no               | 1                         | normal       |
| HD-0021 | F/43    | M4            |              | no                           | no                | no               | yes            | no               | yes           | no           | no                | no               | no               | no               | 2                         | normal       |
| HD-0026 | F/39    | M4            |              | no                           | no                | no               | yes            | no               | no            | yes          | no                | p.Arg140Gln      | no               | no               | 3                         | normal       |
| HD-0027 | M/62    | M4            |              | p.Tyr377LeuX223              | no                | no               | no             | no               | no            | no           | no                | p.Arg140Gln      | no               | no               | 2                         | normal       |
| HD-0031 | M/77    | M5a           |              | no                           | no                | no               | no             | no               | no            | no           | no                | no               | p.Asp299ProfsX20 | no               | 1                         | normal       |
| HD-0060 | F/41    | M5a           |              | no                           | no                | no               | no             | no               | yes           | no           | no                | no               | no               | no               | 1                         | trisomy 8    |
| HD-0097 | F/55    | M4            |              | p.His105Tyr                  | no                | no               | no             | no               | yes           | no           | no                | no               | no               | no               | 2                         | normal       |
| HD-0099 | F/61    | M2            |              | no                           | no                | yes              | no             | no               | no            | na           | yes               | no               | no               | no               | 2                         | trisomy 8    |
| HD-0100 | M/78    | M2            |              | no                           | no                | no               | no             | no               | no            | no           | no                | p.Arg140Gln      | no               | no               | 1                         | trisomy 8    |
| HD-0101 | M/29    | M6            |              | no                           | no                | no               | no             | no               | no            | no           | no                | no               | no               | no               | 0                         | trisomy 8    |
| HD-0102 | F/45    | M4            |              | no                           | no                | no               | yes            | no               | no            | no           | no                | no               | no               | no               | 1                         | trisomy 8    |
| HD-0104 | M/79    | M2            |              | p.Tyr380X                    | no                | yes              | no             | no               | no            | no           | no                | p.Arg140Gln (nc) | no               | no               | 3                         | normal       |
| HD-0106 | F/59    | M5a           |              | no                           | no                | no               | no             | no               | yes           | no           | no                | no               | no               | no               | 1                         | normal       |
| HD-0107 | M/75    | M4            |              | no                           | p.Asp1376Gly      | no               | yes            | no               | no            | no           | no                | no               | no               | no               | 2                         | normal       |
| HD-0108 | M/46    | M1            |              | no                           | no                | no               | yes            | no               | yes           | no           | no                | p.Arg132His      | no               | no               | 3                         | normal       |
| HD-0109 | M/60    | M1            |              | no                           | no                | no               | no             | no               | no            | no           | no                | no               | p.Arg172Lys      | no               | 1                         | normal       |
| HD-0110 | F/40    | M4            |              | no                           | no                | no               | yes            | no               | no            | no           | no                | p.Arg132His      | no               | no               | 1                         | normal       |
| HD-0112 | F/44    | M1            |              | no                           | no                | no               | yes            | no               | no            | no           | no                | no               | no               | p.Ser313X        | 2                         | normal       |
| HD-0113 | F/49    | M5b           |              | no                           | no                | no               | yes            | no               | yes           | no           | no                | no               | no               | no               | 2                         | normal       |
| HD-0114 | F/69    | na            |              | no                           | no                | no               | yes            | no               | yes           | no           | no                | no               | p.Arg172Lys      | no               | 3                         | trisomy 8    |
| HD-0115 | M/71    | M2            |              | no                           | no                | no               | yes            | no               | yes           | no           | no                | p.Arg140Gln      | no               | no               | 3                         | trisomy 8    |
| HD-0116 | F/49    | na            |              | no                           | no                | no               | yes            | no               | no            | no           | no                | no               | no               | no               | 1                         | normal       |
| HD-0117 | F/74    | M2            |              | no                           | no                | no               | yes            | no               | yes           | no           | no                | no               | no               | no               | 2                         | normal       |
| HD-0118 | M/69    | M5b           |              | no                           | no                | no               | yes            | no               | no            | no           | no                | no               | no               | no               | 1                         | normal       |
| HD-0119 | M/57    | M2            |              | no                           | no                | no               | yes            | no               | no            | no           | no                | no               | no               | no               | 1                         | normal       |
| HD-0120 | M/53    | M6            |              | no                           | no                | no               | no             | no               | no            | no           | no                | p.Arg132Cys      | no               | no               | 1                         | normal       |
| HD-0121 | F/41    | M1            |              | no                           | no                | no               | yes            | no               | yes           | no           | no                | no               | no               | no               | 2                         | normal       |
| HD-0122 | M/64    | M2            |              | no                           | no                | no               | no             | no               | no            | no           | no                | no               | no               | no               | 0                         | normal       |
| HD-0123 | M/83    | M1            |              | no                           | no                | no               | yes            | no               | yes           | no           | no                | p.Arg140Gln      | no               | no               | 3                         | normal       |
| HD-0124 | F/71    | M5b           |              | no                           | no                | no               | no             | no               | yes           | no           | no                | no               | no               | no               | 1                         | normal       |
| HD-0126 | F/59    | M5b           |              | p.Leu313ProX287              | no                | no               | no             | no               | no            | no           | no                | no               | no               | p.Ser313ValfsX4  | 2                         | normal       |
| HD-0128 | M/77    | M4 or 5       |              | no                           | no                | no               | yes            | no               | no            | no           | no                | p.Arg140Gln      | no               | no               | 2                         | normal       |
| HD-0392 | F/61    | M4            |              | no                           | no                | no               | yes            | no               | no            | yes          | no                | no               | no               | no               | 2                         | normal       |
| HD-0489 | F/60    | na            |              | no                           | no                | yes              | no             | no               | no            | no           | no                | no               | no               | no               | 1                         | trisomy 8    |
| HD-0620 | F/71    | M5            |              | no                           | p.Gln764ProfsX5   | no               | no             | no               | no            | no           | no                | no               | no               | no               | 1                         | normal       |
| HD-0632 | F/66    | M4            |              | no                           | no                | no               | yes            | no               | no            | no           | no                | no               | no               | no               | 1                         | deletion 9q  |
| HD-0649 | M/78    | M5b           |              | no                           | no                | no               | yes            | no               | yes           | no           | no                | no               | no               | no               | 2                         | normal       |
| HD-0693 | M/74    | M5            |              | no                           | no                | no               | yes            | no               | yes           | no           | no                | no               | no               | no               | 2                         | normal       |
| HD-0008 | M/66    | CMML          |              | no                           | p.Asn801CysfsX14  | no               | yes            | no               | no            | no           | no                | no               | no               | no               | 2                         | normal       |
| HD-0024 | M/61    | CMML          |              | no                           | no                | no               | no             | no               | no            | no           | no                | no               | no               | no               | 0                         | normal       |
| HD-0098 | M/77    | MDS           |              | no                           | p.Glu960SerX48    | no               | no             | no               | no            | na           | no                | no               | no               | no               | 1                         | trisomy 8    |
| HD-0103 | M/60    | PMF           |              | no                           | no                | yes              | no             | no               | no            | no           | no                | no               | no               | no               | 1                         | trisomy 8    |
| HD-0105 | F/68    | CMML          |              | no                           | no                | no               | no             | no               | no            | no           | no                | no               | no               | no               | 0                         | normal       |
| HD-0111 | M/71    | MDS           |              | p.Ser318GlnX281              | no                | yes              | no             | no               | no            | no           | no                | no               | no               | no               | 2                         | normal       |
| HD-0125 | M/74    | CMML          |              | p.Arg201Gln                  | no                | yes              | no             | no               | no            | no           | no                | no               | no               | no               | 2                         | normal       |
| HD-0127 | F/74    | CMML          |              | no                           | no                | yes              | no             | no               | no            | no           | no                | p.Arg172Lys      | no               | no               | 2                         | normal       |
| HD-0186 | M/79    | MDS           |              | p.Gly170Arg                  | no                | yes              | no             | no               | no            | no           | no                | p.Arg140Gln      | no               | no               | 3                         | normal       |
| HD-0198 | M/73    | CMML          |              | break                        | no                | yes              | no             | no               | no            | no           | no                | p.Arg172Lys (nc) | no               | no               | 3                         | trisomy 8    |
| HD-0282 | M/61    | CMML          |              | no                           | no                | yes              | no             | no               | yes           | no           | no                | no               | no               | no               | 2                         | normal       |
| HD-0304 | M/69    | MDS (HD-0264) |              | no                           | p.Leu862SerfsX6   | yes              | no             | p.Glu366Lys      | no            | na           | no                | no               | no               | no               | 3                         | trisomy 11   |
| HD-0379 | F/70    | PV            |              | no                           | no                | no               | no             | no               | no            | no           | no                | p.Arg140Gln      | no               | no               | 1                         | normal       |
| HD-0381 | F/73    | CMML          |              | no                           | p.Ser792X         | deletion         | no             | no               | no            | no           | no                | no               | no               | no               | 2                         | deletion 20q |
| HD-0402 | M/70    | CMML          |              | no                           | no                | no               | yes            | no               | yes           | no           | no                | no               | no               | no               | 2                         | normal       |
| HD-0630 | M/61    | CMML          |              | no                           | no                | no               | no             | no               | no            | no           | no                | p.Arg140Gln      | no               | no               | 1                         | normal       |
| HD-0702 | M/82    | CMML          |              | p.Tyr380X                    | no                | no               | no             | no               | no            | no           | yes               | no               | no               | no               | 2                         | trisomy 8    |
| HD-0790 | M/74    | MDS (HD-0173) |              | p.Trp106Leu; p.Asn146MetfsX6 | no                | no               | no             | no               | no            | no           | no                | no               | no               | no               | 2                         | normal       |
